# Supplementary material for: Landowner preferences pave the way for the incorporation of tree configurations on private land in rural Costa Rica
Source: Research Square preprint supplement (doi:10.21203/rs.3.rs-2260004/v1), 2022-11-14
Supplement: Supplementary file 1 [file 9b8950af275a91cdea1666a5.docx]

| **Forested Patch**  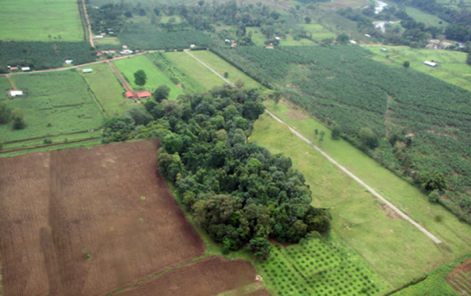 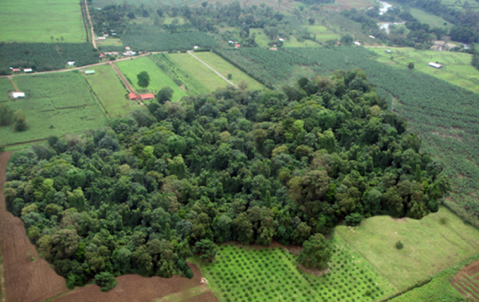 |
| --- |
| **Forested Corridor**  **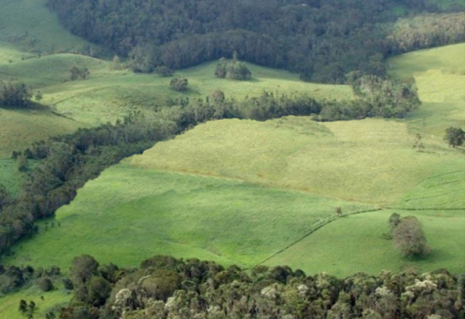 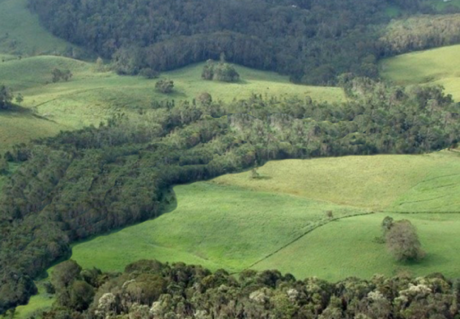** |
| **Isolated Trees**  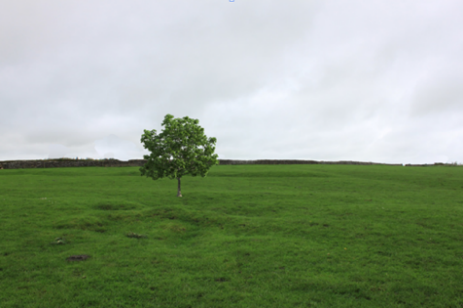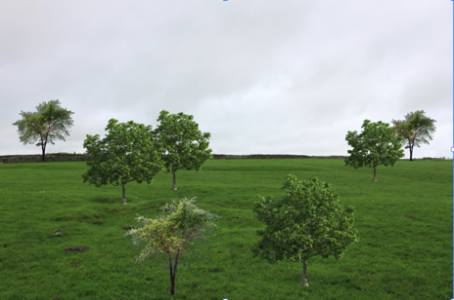 |
| **Living Fences**  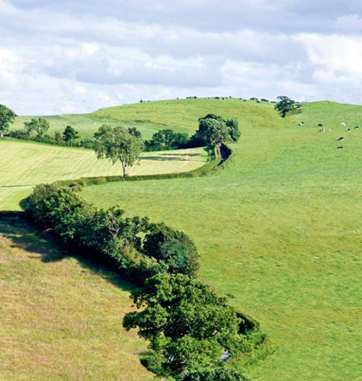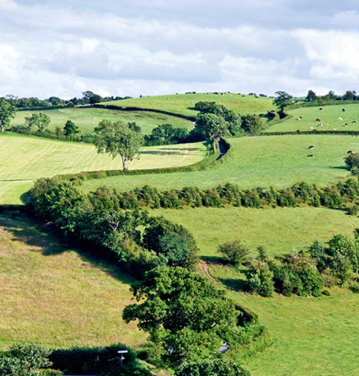 |
| **Riparian Corridor**  *(In compliance with minimum legal requirements)*  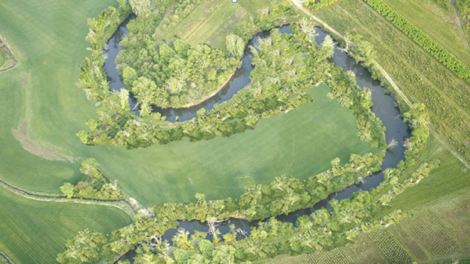 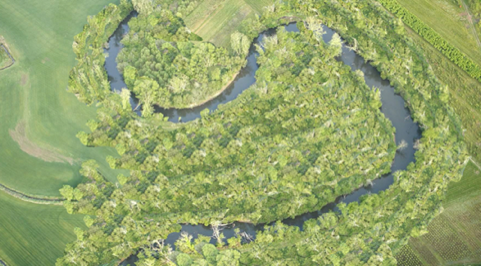 |

Appendix A. All manipulated images included in the survey to elicit stakeholder interest in having various tree configurations on their property. Tree configurations included: Forested Patch, Forested Corridor, Isolated Trees, Living Fences, and Riparian Corridor. The left column depicts the *small* example of the tree configuration, while the right column depicts the *large* example. Survey participants rated each picture individually on a Likert-type scale for how interested they would be to have the tree configuration on their property, from (1) *not at all interested* to (5) *very interested.*
